# Supplementary material
Source: HighWire-hosted journal article supplement (http://www.qdcxjkg.com/highwire/filestream/112610/field_highwire_adjunct_files/0/ERJ_7_1910.pdf)
Supplement: ERJ_7_1910.pdf [file ERJ_7_1910.pdf]

## CORRIGENDUM

**"The expression of intercellular adhesion molecule-1 and the  $\beta$ 1-integrins in asthma"**. N.D. Manolitsas, C.J. Trigg, A.E. McAulay, J.H. Wang, S.E. Jordan, A.J. D'Ardenne, R.J. Davies. *European Respiratory Journal* 1994; 7: 1439–1444.

Unfortunately, during printing the photo-micrographs of figures 3 and 4 were inadvertently reversed. Photo-micrographs shown for **Figure 4** *should be*, in fact, **Figure 3**, and that shown for **Figure 3** *should be* **Figure 4**. The legends are correct as printed.
